# Supplementary material for: Multispectral optoacoustic tomography for non-invasive disease phenotyping in pediatric spinal muscular atrophy patients
Source: PubMed Central journal article supplement (PMC8607197; doi:10.1016/j.pacs.2021.100315), 2021-11-10
Supplement: mmc1.pdf [file mmc1.pdf]

## **Supplementary Appendix**

This appendix has been provided by the authors to give readers additional information about their work.

Supplement to: Regensburger A. P.\*, Wagner A. L.\* et al. **“Multispectral Optoacoustic Tomography for non-invasive disease phenotyping in pediatric spinal muscular atrophy patients”**

**Supplementary Table 1 – Physical examination assignment**

| < 2 years         | ≥ 2 years<br>and no<br>ability to sit | ≥ 2 years<br>and ability<br>to sit in<br>wheelchair | ≥ 2 years<br>and ability<br>to sit | ≥ 3 years and<br>ability to walk |
|-------------------|---------------------------------------|-----------------------------------------------------|------------------------------------|----------------------------------|
| HINE<br>Section 2 | HINE<br>Section 2                     | HINE<br>Section 2                                   |                                    |                                  |
| CHOP Intend       | CHOP Intend                           | CHOP Intend                                         |                                    |                                  |
|                   |                                       | (HFMSE)                                             | HFMSE                              | HFMSE                            |
|                   |                                       | RULM                                                | RULM                               | RULM                             |
|                   |                                       |                                                     |                                    | 6MWT                             |

**Supplementary Table 1 – Physical examination assignment**

HINE= The Hammersmith Infant Neurological Examination, Section 2 (measures motor milestones, range 0-26; lower score represents a lower development of motor milestones),<sup>1, 2</sup> CHOP-Intend= The Children’s Hospital of Philadelphia Infant Test of Neuromuscular Disorders (measures motor skills, range 0-64, lower score represents a lower repertoire of motor skills),<sup>3, 4</sup> HFMSE= Hammersmith functional motor scale-expanded (measures motor function, range 0-66, lower score represents lower motor function),<sup>5-7</sup> RULM= Revised upper Limb Module (measures upper limb function, range 0-37, lower score represents lower upper limb motor function),<sup>8</sup> 6-MWT=6-minute-walk-test (measures walking distance in meter within six minutes; range: 0-theoretically infinite; lower distance represents a higher degree of muscle function loss).<sup>9</sup> All subjects were tested by three well-trained physiotherapists (J.T., P.P., M. M.-A.) with respect to their age and physical function prior to ultrasound and MSOT imaging.

### Supplementary Table 2 – Duration of examinations

| Duration of examinations              |             |              |
|---------------------------------------|-------------|--------------|
|                                       | HV (n = 10) | SMA (n = 10) |
| Duration of physical examination-min. | 32.5±6.0    | 40.3±10.1    |
| Duration of Ultrasound-min.           | 10.7±2.8    | 15.1±4.5     |
| Duration of MSOT-min.*                | 32.3±6.8    | 40.9±4.4     |

### Supplementary Table 2 – Duration of examinations

Min.= minutes, HV=healthy volunteers, SMA = SMA patients, mean±SD are labeled Plus-minus values. Data are shown as mean±SD. n = 20 biologically independent subjects (n = 10 HV/n = 10 SMA). \* door to door time including explanations and breaks, if necessary.

**Supplementary Table 3 – Physical examination of SMA patients and healthy volunteers**

| <b>Physical examination of HV and SMA patients</b> |             |             |
|----------------------------------------------------|-------------|-------------|
|                                                    | HV (n = 0)  | SMA (n = 3) |
| <b>HINE – score</b>                                | -           | 4.3±1.16    |
|                                                    | HV (n = 0)  | SMA (n = 2) |
| <b>CHOP-Intend – score</b>                         | -           | 25.0±5.7    |
|                                                    | HV (n = 10) | SMA (n = 9) |
| <b>HFMSE – score</b>                               | 65.6±1.0    | 25.7±21.8   |
| <b>RULM –score</b>                                 | 36.8±0.4    | 24.0±10.5   |
|                                                    | HV (n = 10) | SMA (n = 2) |
| <b>6-MWT – meter</b>                               | 538.0±94.2  | 264.5±14.9  |

**Supplementary Table 3 – Physical examination of SMA patients and healthy volunteers** HV=healthy volunteers, SMA=SMA patients, mean ±SD are labeled Plus-minus values. Data are shown as mean±SD. n = 20 biologically independent subjects (n = 10 HV/n = 10 SMA). Physical tests were not uniformly completed. Incomplete tests were excluded for analysis. HINE= The Hammersmith Infant Neurological Examination, Section 2 (measures motor milestones, range 0-26; lower score represents a lower development of motor milestones),<sup>1,2</sup> CHOP-Intend= The Children’s Hospital of Philadelphia Infant of Neuromuscular Disorders (measures motor skills, range 0-64, lower score represents a lower repertoire of motor skills)<sup>3, 4</sup>, HFMSE= Hammersmith functional motor scale-expanded (measures motor function, range 0-66, lower score represents lower motor function)<sup>5-7</sup>, RULM= Revised upper Limb Module (measures upper limb function, range 0-37, lower score represents lower upper limb motor function)<sup>8</sup>, 6-MWT=6-minute-walk-test (measures walking distance within six minutes; range: 0-theoretically infinite; lower distance represents a higher degree of muscle function loss)<sup>9</sup>.

**Supplementary Table 4 – B-mode ultrasound results of independent muscle regions**

|                             | <b>Ultrasound Scoring</b> | <b>HV (N=10,<br/>N=80 scans)</b> | <b>SMA (N=10,<br/>N=80 scans)</b> |
|-----------------------------|---------------------------|----------------------------------|-----------------------------------|
| <b>Echogenicity</b>         | hypo-echogenic            | 80 (100%)                        | 7 (8.75%)                         |
|                             | echogenic                 | 0                                | 10 (12.5%)                        |
|                             | hyper-echogenic           | 0                                | 63 (78.75%)                       |
| <b>Muscle texture</b>       | coarse-granular           | 4 (5%)                           | 10 (12.5%)                        |
|                             | medium-granular           | 45 (56.25%)                      | 0                                 |
|                             | fine-granular             | 31 (38.75%)                      | 70 (87.75%)                       |
| <b>Distribution pattern</b> | Focal                     | 0                                | 0                                 |
|                             | Inhomogeneous             | 80 (100%)                        | 80 (100%)                         |
|                             | Homogeneous               | 0                                | 0                                 |
| <b>Heckmatt scale</b>       | 1                         | 80 (100%)                        | 13 (16.25%)                       |
|                             | 2                         | 0                                | 16 (20%)                          |
|                             | 3                         | 0                                | 34 (42.50%)                       |
|                             | 4                         | 0                                | 17 (21.25%)                       |
| <b>Pathological</b>         | No                        | 80 (100%)                        | 8 (10%)                           |
|                             | Yes                       | 0                                | 72 (90%)                          |

**Supplementary Table 4 – B-mode ultrasound results of independent muscle regions**

HV=healthy volunteers, SMA=SMA patients. N=160 images (n = 80 HV/ n= 80 SMA) were evaluated for echo intensity, muscle texture, distribution pattern, Heckmatt scale, and pathological rating. The investigator (JJ) assessed echogenicity (hypoechoogenic/echogenic/hyperechogenic), muscle texture (coarse-/medium-/fine-granular), distribution pattern (inhomo-/homo-geneous/focal) and Heckmatt scale (grade 1-4: 1 = normal muscle echo, 2 = increased muscle echo while bone echo is still distinct, 3 = increased muscle echo and reduced bone echo, 4 = very strong muscle echo and complete loss of bone echo) in parallel to the examination.<sup>10,11</sup> Furthermore, the muscle was

evaluated by the overall impression as healthy or pathological. Categorical variables are provided as numbers and percentages. n = 160 independent muscle regions (n = 80 HV/n = 80 SMA) in n = 20 biologically independent subjects (n = 10 HV/n = 10 SMA patients).

**Supplementary Table 5 – Adverse events**

|                                           | <b>HV<br/>N=10</b> | <b>SMA patients<br/>N=10</b> |
|-------------------------------------------|--------------------|------------------------------|
| <b>Reversible adverse events- no. (%)</b> |                    |                              |
| <b>Coolness of Ultrasound-gel</b>         | 1 (10%)            | 1 (10%)                      |
| <b>Serious adverse events- no. (%)</b>    | 0 (0%)             | 0 (0%)                       |

**Supplementary Table 5 – Adverse events**

In each group one patient complained about the coolness of the ultrasound-gel. The gel was then removed. No serious adverse events occurred during the study.

## References

1. Haataja L, Mercuri E, Regev R, et al. Optimality score for the neurologic examination of the infant at 12 and 18 months of age. *J Pediatr* 1999;135:153-161.
2. Bishop KM, Montes J, Finkel RS. Motor milestone assessment of infants with spinal muscular atrophy using the hammersmith infant neurological Exam-Part 2: Experience from a nusinersen clinical study. *Muscle Nerve* 2018;57:142-146.
3. Glanzman AM, Mazzone E, Main M, et al. The Children's Hospital of Philadelphia Infant Test of Neuromuscular Disorders (CHOP INTEND): test development and reliability. *Neuromuscul Disord* 2010;20:155-161.
4. Glanzman AM, McDermott MP, Montes J, et al. Validation of the Children's Hospital of Philadelphia Infant Test of Neuromuscular Disorders (CHOP INTEND). *Pediatr Phys Ther* 2011;23:322-326.
5. O'Hagen JM, Glanzman AM, McDermott MP, et al. An expanded version of the Hammersmith Functional Motor Scale for SMA II and III patients. *Neuromuscul Disord* 2007;17:693-697.
6. Glanzman AM, O'Hagen JM, McDermott MP, et al. Validation of the Expanded Hammersmith Functional Motor Scale in spinal muscular atrophy type II and III. *J Child Neurol* 2011;26:1499-1507.
7. Ramsey D, Scoto M, Mayhew A, et al. Revised Hammersmith Scale for spinal muscular atrophy: A SMA specific clinical outcome assessment tool. *PLoS One* 2017;12:e0172346.
8. Mazzone ES, Mayhew A, Montes J, et al. Revised upper limb module for spinal muscular atrophy: Development of a new module. *Muscle Nerve* 2017;55:869-874.
9. Montes J, McDermott MP, Martens WB, et al. Six-Minute Walk Test demonstrates motor fatigue in spinal muscular atrophy. *Neurology* 2010;74:833-838.
10. Heckmatt JZ, Leeman S, Dubowitz V. Ultrasound imaging in the diagnosis of muscle disease. *J Pediatr* 1982;101:656-660.
11. Pillen S, Arts IM, Zwarts MJ. Muscle ultrasound in neuromuscular disorders. *Muscle Nerve* 2008;37:679-693.
